# Supplementary material for: In vitro bioactivity and phytochemical characterization of a polyherbal extract with antioxidant and anticancer properties
Source: PeerJ. 2026 Feb 17;14:e20824. doi: 10.7717/peerj.20824 (PMC12922583; doi:10.7717/peerj.20824)
Supplement: Supplemental Information 1 — Identified chemical compounds along with their chemical formulas, molecular weights, retention times (Rt), and relative peak area percentages. [file peerj-14-20824-s001.xlsx]

## Sheet: Sheet3 (2)
		Peak	Name	Chemical formula	Molecular weight (g/mol)	Rt	Area %
		1	1H,6H-Triazolo[4,5-E][1,2,3]-benzotriazole-5-amine	C6H5N7	175.15	13.428	1.41129
		2	Phenol, 2,2'-(1,2-ethanediylidenedinitrilo)bis-	C14H12N2O2	240.25	14.838	1.67935
		3	2-Oxo-6-phenyl-1,2-dihydro-3,4-pyridinedicarbonitrile	C13H7N3O	221.21	15.101	5.20825
		4	[1,1'-Bicyclopropyl]-2-octanoic acid, 2'-hexyl-, methyl ester	C21H38O2	322.52	15.768	7.9197
		5	1,3,5-Triazine-2,4-diamine, N,N'-bis(1-methylethyl)-6-(methylsulfonyl)-	C10H19N5O2S	273.35	16.902	1.00472
		6	4-Benzyl-1-[4-(4-methoxy-phenyl)-thiazol-2-yl]-piperidine	C22H24N2OS	364.5	23.179	12.0202
		7	Acetamide, N-(6-acetylaminobenzothiazol-2-yl)-2-(adamantan-1-yl)-	C21H25N3O2S	383.5	23.309	8.40381
		8	Pyridazine-3,5-dicarbonitrile, 1,6-dihydro-4-benzyl-6-oxo-1-phenyl-	C19H12N4O	312.32	32.583	0.834311
		9	4-Dehydroxy-N-(4,5-methylenedioxy-2-nitrobenzylidene)tyramine	C16H14N2O4	298.29	34.767	15.5001
		10	4-Methyl-6-phenyltetrahydro-1,3-oxazine-2-thione	C11H13NOS	207.29	36.63	1.59811
		11	2H-1-Benzopyran, 2,2-diphenyl-	C21H16O	248.35	39.287	1.14575
		12	4-(6,7-Dimethoxy-2H-1,3-benzodioxol-5-yl)-1H,4H,6H,8H-pyrazolo[3,4-e][1,4]thiazepin-7-one	C15H15N3O5S	349.36	40.75	4.58851
		13	Benzene, 1-(4-diethylaminobenzylidenamino)-4-phenylazo-	C23H24N4	356.46	41.459	0.256646
		14	2,3-pyrazinediamine, N2,N3,5,6-tetraphenyl-	C28H22N4	414.5	43.776	20.981
		15	Benzenemethanamine, α-[2-imino-2-phenyl-1-(phenylmethyl)ethylidene]-N-phenyl-	C28H24N2	388.5	45.558	2.36099
		16	: (+-)-O-Benzylcheilanthifoline	C26H25NO4	415.48	58.414	11.8713
		17	Benzenamine, 4,4'-((6-phenyl-2,4-pyrimidinediyl)bis-	C22H18N4	338.4	63.036	2.10266
		18	2-[2,2,3,3,3-Pentafluoro-1-(4-phenoxy-phenylamino)-propylidene]-malononitrile	C18H10F5N3O	379.28	73.624	1.11326
