# Supplementary material for: In vitro bioactivity and phytochemical characterization of a polyherbal extract with antioxidant and anticancer properties
Source: PeerJ. 2026 Feb 17;14:e20824. doi: 10.7717/peerj.20824 (PMC12922583; doi:10.7717/peerj.20824)
Supplement: Supplemental Information 5 — Gallic acid concentrations, corresponding absorbance values, and calculated mean ± standard deviation. [file peerj-14-20824-s005.xlsx]

## Sheet: Phenol
	(mg GAE/g DW)					(mg GAE/g DW)	SD
1	89.3459	88.9057	89.7862			89.3459	0.359464
2	64.2516	63.434	63.7484			63.8113	0.336737
3	105.509	104.943	105.981			105.478	0.424237
15.625	0.127
31.25	0.235
62.5	0.377
125	0.721
250	1.379

## Sheet: Tannin
	(mg TAE/g DW)						(mg TAE/g DW)	SD
1	88.6042	89.2292	87.9792				88.6042	0.51031
2	60.0625	61.1042	60.2708				60.4792	0.450051
3	98.8125	99.6458	98.6042				99.0208	0.450051
15.625	0.046
31.25	0.107
62.5	0.257
125	0.583
250	1.159

## Sheet: Flavonoid
	(mg QE/g DW)					(mg QE/g DW)	SD
1	28.6468	28.7857	28.5675			28.6667	0.0901996
2	15.6706	15.5317	15.8095			15.6706	0.113402
3	32.1984	32.4167	32.5556			32.3902	0.146998
6.25	0.372
12.5	0.507
25	0.721
50	1.156
100	1.962

## Sheet: Flavonol
	(mg RE/g DW)					(mg RE/g DW)	SD
1	10.5182	10.7	10.3364			10.5182	0.148454
2	5.54848	5.82121	5.21515			5.52828	0.247835
3	24.3836	24.0382	23.8745			24.0988	0.212208
6.25	0.047
12.5	0.105
25	0.181
50	0.292
100	0.589
200	1.125

## Sheet: DPPH
DPPH
1	µg/ml	Inhibition %					2	µg/ml	Inhibition %					3	µg/ml	Inhibition %
	31.25	8.98437	9.35673	9.60784				62.5	2.34375	2.14425	2.54902				15.625	28.1106	27.2517	28.0742
	62.5	15.8203	16.3743	15.2941				125	4.10156	5.45809	4.5098				31.25	52.0737	52.6559	51.5081
	125	25	25.731	26.0784				250	12.1094	12.6706	12.9412				62.5	72.1198	72.5173	72.1578
	250	41.6016	43.2749	43.5294				500	25.9766	25.5361	26.6667				125	81.5668	81.7552	82.1346
	500	66.2109	66.6667	65.6863				1000	52.7344	53.6062	50.7843				250	91.2442	90.7621	91.8794
	1000	76.9531	76.6082	75.2941				1500	75.7812	74.8538	76.2745				500	92.8571	93.0716	92.3434
	2000	92.5781	92.7875	93.3333				3000	82.2266	82.846	83.5294				1000	94.0092	94.4573	94.1995
					Concentration (µg/ml)	Inhibition %	SD
				1	31.25	9.31631	0.256129
					62.5	15.8296	0.441018
					125	25.6031	0.449454
					250	42.8019	0.855135
					500	66.188	0.400573
					1000	76.2851	0.71477
					2000	92.8997	0.318346
				2	Concentration (µg/ml)	Inhibition %	SD
					62.5	2.34567	0.165252
					125	4.68982	0.56824
					250	12.5737	0.34642
					500	26.0598	0.465302
					1000	52.375	1.17974
					1500	75.6365	0.588961
					3000	82.8673	0.5321
				3	Concentration (µg/ml)	Inhibition %	SD
					15.625	27.8122	0.396583
					31.25	52.0792	0.468591
					62.5	72.265	0.179111
					125	81.8189	0.236115
					250	91.2952	0.457529
					500	92.7574	0.305545
					1000	94.222	0.183608

## Sheet: ABTS
DPPH
1	µg/ml	Inhibition %					2	µg/ml	Inhibition %					3	µg/ml	Inhibition %
	31.25	6.25	6.58683	5.12048				62.5	4.16667	4.79042	5.12048				15.625	27.9762	28.7425	27.4096
	62.5	14.2857	14.6707	15.3614				125	7.14286	7.48503	6.92771				31.25	47.9167	48.503	48.494
	125	24.1071	24.5509	23.7952				250	10.4167	10.1796	9.93976				62.5	66.6667	64.9701	65.3614
	250	46.7262	47.6048	47.5904				500	31.25	31.7365	30.7229				125	81.25	80.5389	81.9277
	500	70.5357	69.7605	68.3735				1000	58.9286	59.5808	60.241				250	88.0952	86.8263	88.5542
	1000	86.0119	85.6287	86.747				1500	76.4881	77.5449	76.506				500	95.5357	94.9102	95.7831
	2000	94.6429	95.2096	95.4819				3000	87.5	86.5269	86.4458				1000	97.619	97.006	97.5904
						Concentration (µg/ml)	Inhibition %	SD
					1	31.25	5.98577	0.627112
						62.5	14.7726	0.445043
						125	24.1511	0.31008
						250	47.3071	0.410817
						500	69.5566	0.894422
						1000	86.1292	0.463996
						2000	95.1115	0.349506
					2	Concentration (µg/ml)	Inhibition %	SD
						62.5	4.69252	0.395499
						125	7.1852	0.229486
						250	10.1787	0.194698
						500	31.2365	0.413925
						1000	59.5835	0.535785
						1500	76.8463	0.494016
						3000	86.8242	0.47898
					3	Concentration (µg/ml)	Inhibition %	SD
						15.625	28.0428	0.546178
						31.25	48.3045	0.274296
						62.5	65.6661	0.725355
						125	81.2389	0.567025
						250	87.8253	0.730774
						500	95.4097	0.367356
						1000	97.4051	0.282481
